# Supplementary material for: Variants in the host genome may inhibit tumour growth in devil facial tumours: evidence from genome-wide association
Source: PubMed Central journal article supplement (PMC5428454; doi:10.1038/s41598-017-00439-7), 2017-03-24
Supplement: 41598_2017_439_MOESM1_ESM.pdf [file 41598_2017_439_MOESM1_ESM.pdf]

1 Variants in the host genome may inhibit tumour growth in devil facial tumours: evidence from  
2 genome-wide association

3

4 Belinda Wright<sup>1</sup>, Cali E Willet<sup>1,3</sup>, Rodrigo Hamede<sup>2</sup>, Menna Jones<sup>2</sup>, Katherine Belov<sup>1</sup>, Claire M  
5 Wade<sup>1\*</sup>

6 1. School of Life and Environmental Sciences, Faculty of Veterinary Science, University of Sydney,  
7 Sydney, NSW, Australia

8 2. School of Biological Sciences, University of Tasmania, Hobart, Tasmania, Australia

9 3. Sydney Informatics Core Research Facility, University of Sydney, Sydney, New South Wales,  
10 Australia

11

## 12 **Supplementary material**

13 Stratification and relatedness

14 The mean genomic relationship across all samples was 0.14 as measured by the proportion of SNPs  
15 where one allele is shared between individuals and the proportion where two alleles are shared by  
16 descent (IBD). Two samples (one in each of the control and regressed cases groups) had a genomic  
17 relationship coefficient of 0.47 which is indicative of a first order relationship. Other animals  
18 demonstrated second order or lower relationship. Despite this, the multi-dimensional scaling plot shows  
19 no stratification in clustering of cases and controls giving us confidence that there are no underlying  
20 familial relationships which may skew our analyses (Figure 1).

21

22 As 11 of our 13 samples came from a single, fairly isolated population of Tasmanian devils, we  
23 investigated relatedness and stratification amongst our samples. There was no clustering of our cases  
24 and controls (Figure S1) giving us confidence that stratified familial relationships within these two

25 groups did not impact results. Of the four familial relationships implied from the assessment of IBD (one  
26 1st order, three 2nd order relationships) three were among individuals from different groups (cases and  
27 controls). This lends further confidence that genomic differences between our study groups are not  
28 purely due to familial relationships.  
29

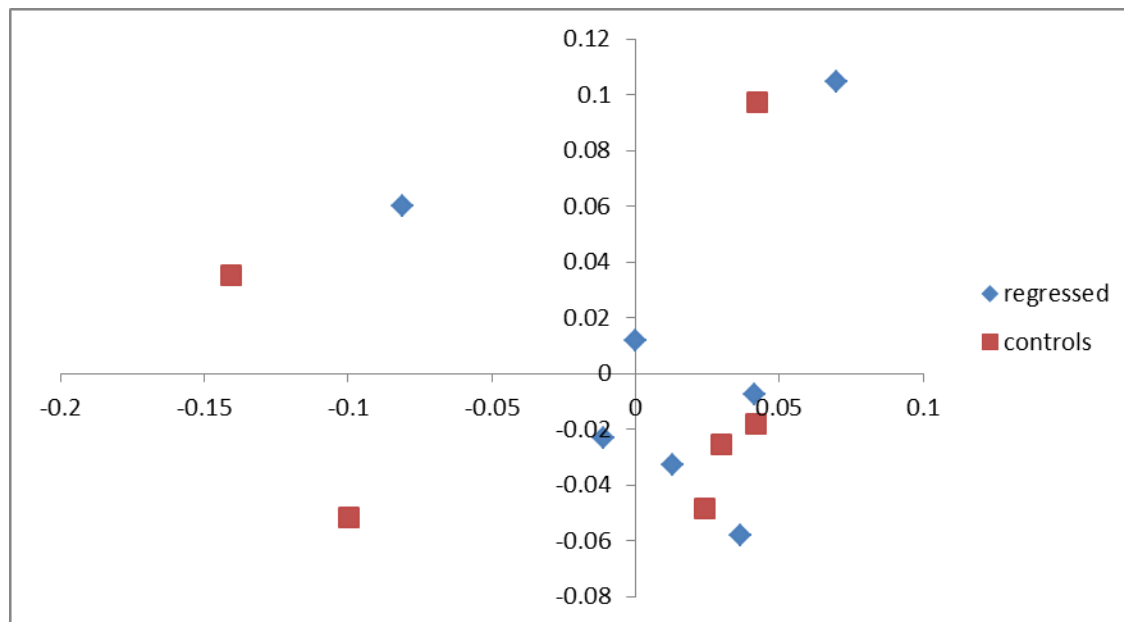

30  
31 Fig S1 Multi-dimensional scaling plot of first and second principle components (C1 - X axis, C2 - Y axis)  
32 displaying no stratification for the case (regressed) and control groups.  
33

#### 34 Variant discovery

#### 35 SNPs

36 After initial filtering on MAF of 5% there were 700,967 SNPs identified across all 14 genomes used in the  
37 SNP discovery phase. Removing one sample not suitable for the GWAS and further filtering on MAF of  
38 12% and genotyping failure rate of 1% resulted in 466,896 SNPs. These were then pruned for LD and the  
39 resulting pruned dataset consisted of 291,263 SNPs. All reported results from the GWAS were obtained  
40 from this pruned dataset.

41

42 INDELS

43 There were 612190 INDEL sites identified across the genome amongst all 14 genomes compared after  
44 filtering on quality  $\geq 20$ . INDELS within the regions of significant SNPs from the GWAS were examined for  
45 any potential impact on coding regions.

Table S1: Top 100 SNPs from genome-wide association. Minor allele frequency (MAF) and p value of test for Hardy-Weinberg equilibrium are shown for all samples and genotype (GT) ratios and observed and expected heterozygosity ( $H_O$  and  $H_E$ ) are depicted for all samples as well as separated by cases and controls.

| SNP                 | A1 | A2 | MAF   | Controls |       |       | Regressed cases |       |       | All samples |       |       |             |
|---------------------|----|----|-------|----------|-------|-------|-----------------|-------|-------|-------------|-------|-------|-------------|
|                     |    |    |       | GT ratio | $H_O$ | $H_E$ | GT ratio        | $H_O$ | $H_E$ | GT ratio    | $H_O$ | $H_E$ | HWE P value |
| Chr1_0002:319194_T  | C  | T  | 0.462 | 0/1/5    | 0.167 | 0.153 | 4/3/0           | 0.429 | 0.337 | 4/4/5       | 0.308 | 0.497 | 0.2608      |
| Chr1_0002:343297_C  | T  | C  | 0.423 | 0/1/5    | 0.167 | 0.153 | 3/4/0           | 0.571 | 0.408 | 3/5/5       | 0.385 | 0.488 | 0.5736      |
| Chr1_0216:2418139_T | C  | T  | 0.269 | 3/1/2    | 0.167 | 0.486 | 0/0/7           | 0.000 | 0.000 | 3/1/9       | 0.077 | 0.394 | 0.0087      |
| Chr1_0248:220779_T  | T  | G  | 0.462 | 4/2/0    | 0.333 | 0.278 | 0/2/5           | 0.286 | 0.245 | 4/4/5       | 0.308 | 0.497 | 0.2608      |
| Chr1_0256:404031_T  | C  | T  | 0.269 | 1/5/0    | 0.833 | 0.486 | 0/0/7           | 0.000 | 0.000 | 1/5/7       | 0.385 | 0.394 | 1.0000      |
| Chr1_0386:377874_T  | C  | T  | 0.423 | 0/0/6    | 0.000 | 0.000 | 5/1/1           | 0.143 | 0.337 | 5/1/7       | 0.077 | 0.488 | 0.0027      |
| Chr2_0233:613297_A  | A  | G  | 0.385 | 4/1/1    | 0.167 | 0.375 | 0/1/6           | 0.143 | 0.133 | 4/2/7       | 0.154 | 0.473 | 0.0196      |
| Chr2_0233:737665_G  | G  | C  | 0.385 | 4/1/1    | 0.167 | 0.375 | 0/1/6           | 0.143 | 0.133 | 4/2/7       | 0.154 | 0.473 | 0.0196      |
| Chr2_0238:802658_T  | C  | T  | 0.269 | 2/3/1    | 0.500 | 0.486 | 0/0/7           | 0.000 | 0.000 | 2/3/8       | 0.231 | 0.394 | 0.1652      |
| Chr2_0280:4111_A    | A  | C  | 0.385 | 3/3/0    | 0.500 | 0.375 | 0/1/6           | 0.143 | 0.133 | 3/4/6       | 0.308 | 0.473 | 0.2557      |
| Chr2_0398:2032573_G | A  | G  | 0.385 | 3/3/0    | 0.500 | 0.375 | 0/1/6           | 0.143 | 0.133 | 3/4/6       | 0.308 | 0.473 | 0.2557      |
| Chr2_0398:2173106_T | C  | T  | 0.385 | 3/3/0    | 0.500 | 0.375 | 0/1/6           | 0.143 | 0.133 | 3/4/6       | 0.308 | 0.473 | 0.2557      |
| Chr2_0398:2204348_A | G  | A  | 0.385 | 3/3/0    | 0.500 | 0.375 | 0/1/6           | 0.143 | 0.133 | 3/4/6       | 0.308 | 0.473 | 0.2557      |
| Chr2_0398:2211181_C | T  | C  | 0.385 | 3/3/0    | 0.500 | 0.375 | 0/1/6           | 0.143 | 0.133 | 3/4/6       | 0.308 | 0.473 | 0.2557      |
| Chr2_1150:10767_A   | A  | C  | 0.385 | 3/3/0    | 0.500 | 0.375 | 0/1/6           | 0.143 | 0.133 | 3/4/6       | 0.308 | 0.473 | 0.2557      |
| Chr2_1241:60910_A   | G  | A  | 0.346 | 0/0/6    | 0.000 | 0.000 | 2/5/0           | 0.714 | 0.459 | 2/5/6       | 0.385 | 0.453 | 0.5782      |
| Chr2_1775:16162_A   | A  | G  | 0.346 | 0/0/6    | 0.000 | 0.000 | 4/1/2           | 0.143 | 0.459 | 4/1/8       | 0.077 | 0.453 | 0.0041      |
| Chr2_2152:1050_T    | G  | T  | 0.269 | 1/5/0    | 0.833 | 0.486 | 0/0/7           | 0.000 | 0.000 | 1/5/7       | 0.385 | 0.394 | 1.0000      |
| Chr3_0006:836701_T  | C  | T  | 0.346 | 0/0/6    | 0.000 | 0.000 | 3/3/1           | 0.429 | 0.459 | 3/3/7       | 0.231 | 0.453 | 0.0920      |
| Chr3_0048:1413966_T | A  | T  | 0.423 | 0/1/5    | 0.167 | 0.153 | 4/2/1           | 0.286 | 0.408 | 4/3/6       | 0.231 | 0.488 | 0.0855      |
| Chr3_0321:385869_A  | G  | A  | 0.269 | 2/3/1    | 0.500 | 0.486 | 0/0/7           | 0.000 | 0.000 | 2/3/8       | 0.231 | 0.394 | 0.1652      |
| Chr3_0369:197253_T  | T  | G  | 0.269 | 2/3/1    | 0.500 | 0.486 | 0/0/7           | 0.000 | 0.000 | 2/3/8       | 0.231 | 0.394 | 0.1652      |
| Chr3_0369:294229_C  | C  | T  | 0.308 | 3/2/1    | 0.333 | 0.444 | 0/0/7           | 0.000 | 0.000 | 3/2/8       | 0.154 | 0.426 | 0.0334      |
| Chr3_0388:2253019_T | T  | A  | 0.346 | 4/1/1    | 0.167 | 0.375 | 0/0/7           | 0.000 | 0.000 | 4/1/8       | 0.077 | 0.453 | 0.0041      |
| Chr3_0388:2275253_T | T  | C  | 0.308 | 3/2/1    | 0.333 | 0.444 | 0/0/7           | 0.000 | 0.000 | 3/2/8       | 0.154 | 0.426 | 0.0334      |

|                     |   |   |       |       |       |       |       |       |       |       |       |       |        |
|---------------------|---|---|-------|-------|-------|-------|-------|-------|-------|-------|-------|-------|--------|
| Chr3_0388:2284528_A | A | G | 0.346 | 4/1/1 | 0.167 | 0.375 | 0/0/7 | 0.000 | 0.000 | 4/1/8 | 0.077 | 0.453 | 0.0041 |
| Chr3_0388:2290941_C | C | T | 0.308 | 3/2/1 | 0.333 | 0.444 | 0/0/7 | 0.000 | 0.000 | 3/2/8 | 0.154 | 0.426 | 0.0334 |
| Chr3_0388:2306297_T | T | C | 0.346 | 4/1/1 | 0.167 | 0.375 | 0/0/7 | 0.000 | 0.000 | 4/1/8 | 0.077 | 0.453 | 0.0041 |
| Chr3_0388:2311529_A | A | G | 0.308 | 3/2/1 | 0.333 | 0.444 | 0/0/7 | 0.000 | 0.000 | 3/2/8 | 0.154 | 0.426 | 0.0334 |
| Chr3_0388:2326809_C | C | T | 0.346 | 4/1/1 | 0.167 | 0.375 | 0/0/7 | 0.000 | 0.000 | 4/1/8 | 0.077 | 0.453 | 0.0041 |
| Chr3_0388:2332752_C | C | T | 0.308 | 3/2/1 | 0.333 | 0.444 | 0/0/7 | 0.000 | 0.000 | 3/2/8 | 0.154 | 0.426 | 0.0334 |
| Chr3_0388:2347209_C | C | T | 0.308 | 3/2/1 | 0.333 | 0.444 | 0/0/7 | 0.000 | 0.000 | 3/2/8 | 0.154 | 0.426 | 0.0334 |
| Chr3_0388:2379211_T | T | G | 0.308 | 3/2/1 | 0.333 | 0.444 | 0/0/7 | 0.000 | 0.000 | 3/2/8 | 0.154 | 0.426 | 0.0334 |
| Chr3_0388:2429182_G | G | A | 0.308 | 3/2/1 | 0.333 | 0.444 | 0/0/7 | 0.000 | 0.000 | 3/2/8 | 0.154 | 0.426 | 0.0334 |
| Chr3_0388:2450779_G | G | A | 0.346 | 4/1/1 | 0.167 | 0.375 | 0/0/7 | 0.000 | 0.000 | 4/1/8 | 0.077 | 0.453 | 0.0041 |
| Chr3_0388:2464777_T | T | C | 0.346 | 4/1/1 | 0.167 | 0.375 | 0/0/7 | 0.000 | 0.000 | 4/1/8 | 0.077 | 0.453 | 0.0041 |
| Chr3_0388:2475812_A | A | T | 0.308 | 3/2/1 | 0.333 | 0.444 | 0/0/7 | 0.000 | 0.000 | 3/2/8 | 0.154 | 0.426 | 0.0334 |
| Chr3_0388:2485893_G | C | G | 0.269 | 2/3/1 | 0.500 | 0.486 | 0/0/7 | 0.000 | 0.000 | 2/3/8 | 0.231 | 0.394 | 0.1652 |
| Chr3_0388:2500781_G | T | G | 0.269 | 2/3/1 | 0.500 | 0.486 | 0/0/7 | 0.000 | 0.000 | 2/3/8 | 0.231 | 0.394 | 0.1652 |
| Chr3_0388:2510258_A | G | A | 0.269 | 2/3/1 | 0.500 | 0.486 | 0/0/7 | 0.000 | 0.000 | 2/3/8 | 0.231 | 0.394 | 0.1652 |
| Chr3_0388:2544061_A | A | G | 0.346 | 4/1/1 | 0.167 | 0.375 | 0/0/7 | 0.000 | 0.000 | 4/1/8 | 0.077 | 0.453 | 0.0041 |
| Chr3_0388:2550575_C | C | A | 0.308 | 3/2/1 | 0.333 | 0.444 | 0/0/7 | 0.000 | 0.000 | 3/2/8 | 0.154 | 0.426 | 0.0334 |
| Chr3_0388:2561866_C | C | T | 0.308 | 3/2/1 | 0.333 | 0.444 | 0/0/7 | 0.000 | 0.000 | 3/2/8 | 0.154 | 0.426 | 0.0334 |
| Chr3_0388:2572580_A | A | G | 0.308 | 3/2/1 | 0.333 | 0.444 | 0/0/7 | 0.000 | 0.000 | 3/2/8 | 0.154 | 0.426 | 0.0334 |
| Chr3_0388:2583161_C | C | T | 0.346 | 4/1/1 | 0.167 | 0.375 | 0/0/7 | 0.000 | 0.000 | 4/1/8 | 0.077 | 0.453 | 0.0041 |
| Chr3_0388:2587871_T | T | C | 0.346 | 4/1/1 | 0.167 | 0.375 | 0/0/7 | 0.000 | 0.000 | 4/1/8 | 0.077 | 0.453 | 0.0041 |
| Chr3_0388:2594252_A | A | C | 0.308 | 3/2/1 | 0.333 | 0.444 | 0/0/7 | 0.000 | 0.000 | 3/2/8 | 0.154 | 0.426 | 0.0334 |
| Chr3_0388:2598794_G | G | A | 0.346 | 4/1/1 | 0.167 | 0.375 | 0/0/7 | 0.000 | 0.000 | 4/1/8 | 0.077 | 0.453 | 0.0041 |
| Chr3_0388:2604460_A | A | G | 0.269 | 3/1/2 | 0.167 | 0.486 | 0/0/7 | 0.000 | 0.000 | 3/1/9 | 0.077 | 0.394 | 0.0087 |
| Chr3_0388:2619127_T | T | C | 0.346 | 4/1/1 | 0.167 | 0.375 | 0/0/7 | 0.000 | 0.000 | 4/1/8 | 0.077 | 0.453 | 0.0041 |
| Chr3_0388:2619299_C | C | T | 0.269 | 3/1/2 | 0.167 | 0.486 | 0/0/7 | 0.000 | 0.000 | 3/1/9 | 0.077 | 0.394 | 0.0087 |
| Chr3_0388:2625468_C | C | T | 0.308 | 3/2/1 | 0.333 | 0.444 | 0/0/7 | 0.000 | 0.000 | 3/2/8 | 0.154 | 0.426 | 0.0334 |
| Chr3_0388:2638579_C | C | T | 0.308 | 3/2/1 | 0.333 | 0.444 | 0/0/7 | 0.000 | 0.000 | 3/2/8 | 0.154 | 0.426 | 0.0334 |
| Chr3_0388:2650722_A | A | G | 0.308 | 3/2/1 | 0.333 | 0.444 | 0/0/7 | 0.000 | 0.000 | 3/2/8 | 0.154 | 0.426 | 0.0334 |
| Chr3_0388:2660166_C | C | T | 0.346 | 4/1/1 | 0.167 | 0.375 | 0/0/7 | 0.000 | 0.000 | 4/1/8 | 0.077 | 0.453 | 0.0041 |
| Chr3_0388:2668393_C | C | T | 0.308 | 3/2/1 | 0.333 | 0.444 | 0/0/7 | 0.000 | 0.000 | 3/2/8 | 0.154 | 0.426 | 0.0334 |

|                     |   |   |       |       |       |       |       |       |       |       |       |       |        |
|---------------------|---|---|-------|-------|-------|-------|-------|-------|-------|-------|-------|-------|--------|
| Chr3_0388:2733566_A | A | T | 0.308 | 3/2/1 | 0.333 | 0.444 | 0/0/7 | 0.000 | 0.000 | 3/2/8 | 0.154 | 0.426 | 0.0334 |
| Chr3_0388:3285036_G | G | A | 0.269 | 2/3/1 | 0.500 | 0.486 | 0/0/7 | 0.000 | 0.000 | 2/3/8 | 0.231 | 0.394 | 0.1652 |
| Chr3_0388:3704055_C | C | A | 0.269 | 2/3/1 | 0.500 | 0.486 | 0/0/7 | 0.000 | 0.000 | 2/3/8 | 0.231 | 0.394 | 0.1652 |
| Chr3_0388:3828025_A | A | C | 0.269 | 2/3/1 | 0.500 | 0.486 | 0/0/7 | 0.000 | 0.000 | 2/3/8 | 0.231 | 0.394 | 0.1652 |
| Chr3_0388:3846036_A | A | T | 0.269 | 2/3/1 | 0.500 | 0.486 | 0/0/7 | 0.000 | 0.000 | 2/3/8 | 0.231 | 0.394 | 0.1652 |
| Chr3_0512:706_G     | G | A | 0.269 | 2/3/1 | 0.500 | 0.486 | 0/0/7 | 0.000 | 0.000 | 2/3/8 | 0.231 | 0.394 | 0.1652 |
| Chr3_0519:497777_T  | T | A | 0.308 | 3/2/1 | 0.333 | 0.444 | 0/0/7 | 0.000 | 0.000 | 3/2/8 | 0.154 | 0.426 | 0.0334 |
| Chr3_2772:286_A     | A | G | 0.308 | 3/2/1 | 0.333 | 0.444 | 0/0/7 | 0.000 | 0.000 | 3/2/8 | 0.154 | 0.426 | 0.0334 |
| Chr4_0035:1337774_T | T | A | 0.269 | 2/3/1 | 0.500 | 0.486 | 0/0/7 | 0.000 | 0.000 | 2/3/8 | 0.231 | 0.394 | 0.1652 |
| Chr4_0035:643556_T  | T | C | 0.308 | 3/2/1 | 0.333 | 0.444 | 0/0/7 | 0.000 | 0.000 | 3/2/8 | 0.154 | 0.426 | 0.0334 |
| Chr4_0110:536495_T  | T | A | 0.269 | 3/1/2 | 0.167 | 0.486 | 0/0/7 | 0.000 | 0.000 | 3/1/9 | 0.077 | 0.394 | 0.0087 |
| Chr4_0110:543210_A  | A | C | 0.269 | 3/1/2 | 0.167 | 0.486 | 0/0/7 | 0.000 | 0.000 | 3/1/9 | 0.077 | 0.394 | 0.0087 |
| Chr4_0301:1026447_G | G | A | 0.462 | 4/2/0 | 0.333 | 0.278 | 0/2/5 | 0.286 | 0.245 | 4/4/5 | 0.308 | 0.497 | 0.2608 |
| Chr4_0302:675579_G  | G | C | 0.385 | 4/1/1 | 0.167 | 0.375 | 0/1/6 | 0.143 | 0.133 | 4/2/7 | 0.154 | 0.473 | 0.0196 |
| Chr5_0005:437062_G  | G | A | 0.462 | 4/2/0 | 0.333 | 0.278 | 0/2/5 | 0.286 | 0.245 | 4/4/5 | 0.308 | 0.497 | 0.2608 |
| Chr5_0006:2215733_C | T | C | 0.346 | 0/0/6 | 0.000 | 0.000 | 3/3/1 | 0.429 | 0.459 | 3/3/7 | 0.231 | 0.453 | 0.0920 |
| Chr5_0069:1571747_T | C | T | 0.423 | 0/1/5 | 0.167 | 0.153 | 3/4/0 | 0.571 | 0.408 | 3/5/5 | 0.385 | 0.488 | 0.5736 |
| Chr5_0069:1616335_A | G | A | 0.423 | 0/1/5 | 0.167 | 0.153 | 3/4/0 | 0.571 | 0.408 | 3/5/5 | 0.385 | 0.488 | 0.5736 |
| Chr5_0145:32969_C   | T | C | 0.346 | 0/0/6 | 0.000 | 0.000 | 2/5/0 | 0.714 | 0.459 | 2/5/6 | 0.385 | 0.453 | 0.5782 |
| Chr5_2328:912_G     | G | A | 0.423 | 0/1/5 | 0.167 | 0.153 | 3/4/0 | 0.571 | 0.408 | 3/5/5 | 0.385 | 0.488 | 0.5736 |
| Chr6_0050:185261_T  | G | T | 0.269 | 2/3/1 | 0.500 | 0.486 | 0/0/7 | 0.000 | 0.000 | 2/3/8 | 0.231 | 0.394 | 0.1652 |
| Chr6_0081:1099040_G | G | A | 0.423 | 0/1/5 | 0.167 | 0.153 | 3/4/0 | 0.571 | 0.408 | 3/5/5 | 0.385 | 0.488 | 0.5736 |
| Chr6_0081:269543_A  | A | G | 0.346 | 0/0/6 | 0.000 | 0.000 | 3/3/1 | 0.429 | 0.459 | 3/3/7 | 0.231 | 0.453 | 0.0920 |
| Chr6_0081:338939_G  | G | T | 0.346 | 0/0/6 | 0.000 | 0.000 | 3/3/1 | 0.429 | 0.459 | 3/3/7 | 0.231 | 0.453 | 0.0920 |
| Chr6_0081:415652_A  | A | G | 0.346 | 0/0/6 | 0.000 | 0.000 | 3/3/1 | 0.429 | 0.459 | 3/3/7 | 0.231 | 0.453 | 0.0920 |
| Chr6_0081:433138_G  | G | A | 0.346 | 0/0/6 | 0.000 | 0.000 | 3/3/1 | 0.429 | 0.459 | 3/3/7 | 0.231 | 0.453 | 0.0920 |
| Chr6_0081:438380_A  | A | G | 0.346 | 0/0/6 | 0.000 | 0.000 | 3/3/1 | 0.429 | 0.459 | 3/3/7 | 0.231 | 0.453 | 0.0920 |
| Chr6_0081:456505_C  | C | T | 0.346 | 0/0/6 | 0.000 | 0.000 | 3/3/1 | 0.429 | 0.459 | 3/3/7 | 0.231 | 0.453 | 0.0920 |
| Chr6_0081:476140_C  | C | T | 0.346 | 0/0/6 | 0.000 | 0.000 | 3/3/1 | 0.429 | 0.459 | 3/3/7 | 0.231 | 0.453 | 0.0920 |
| Chr6_0081:492347_G  | G | A | 0.346 | 0/0/6 | 0.000 | 0.000 | 3/3/1 | 0.429 | 0.459 | 3/3/7 | 0.231 | 0.453 | 0.0920 |
| Chr6_0081:556198_T  | T | A | 0.346 | 0/0/6 | 0.000 | 0.000 | 3/3/1 | 0.429 | 0.459 | 3/3/7 | 0.231 | 0.453 | 0.0920 |

|                     |   |   |       |       |       |       |       |       |       |       |       |       |        |
|---------------------|---|---|-------|-------|-------|-------|-------|-------|-------|-------|-------|-------|--------|
| Chr6_0081:572557_C  | C | T | 0.346 | 0/0/6 | 0.000 | 0.000 | 3/3/1 | 0.429 | 0.459 | 3/3/7 | 0.231 | 0.453 | 0.0920 |
| Chr6_0081:597647_A  | A | C | 0.346 | 0/0/6 | 0.000 | 0.000 | 3/3/1 | 0.429 | 0.459 | 3/3/7 | 0.231 | 0.453 | 0.0920 |
| Chr6_0081:619210_A  | A | G | 0.385 | 0/0/6 | 0.000 | 0.000 | 4/2/1 | 0.286 | 0.408 | 4/2/7 | 0.154 | 0.473 | 0.0196 |
| Chr6_0081:635881_C  | C | T | 0.346 | 0/0/6 | 0.000 | 0.000 | 3/3/1 | 0.429 | 0.459 | 3/3/7 | 0.231 | 0.453 | 0.0920 |
| Chr6_0081:668083_G  | G | A | 0.385 | 0/0/6 | 0.000 | 0.000 | 4/2/1 | 0.286 | 0.408 | 4/2/7 | 0.154 | 0.473 | 0.0196 |
| Chr6_0081:850942_T  | T | C | 0.462 | 0/1/5 | 0.167 | 0.153 | 4/3/0 | 0.429 | 0.337 | 4/4/5 | 0.308 | 0.497 | 0.2608 |
| Chr6_0081:877431_A  | A | G | 0.423 | 0/1/5 | 0.167 | 0.153 | 3/4/0 | 0.571 | 0.408 | 3/5/5 | 0.385 | 0.488 | 0.5736 |
| Chr6_0099:1377218_G | G | C | 0.462 | 5/0/1 | 0.000 | 0.278 | 0/2/5 | 0.286 | 0.245 | 5/2/6 | 0.154 | 0.497 | 0.0206 |
| Chr6_0328:42978_C   | C | G | 0.346 | 0/0/6 | 0.000 | 0.000 | 3/3/1 | 0.429 | 0.459 | 3/3/7 | 0.231 | 0.453 | 0.0920 |
| Chr6_0597:47260_T   | T | C | 0.346 | 0/0/6 | 0.000 | 0.000 | 3/3/1 | 0.429 | 0.459 | 3/3/7 | 0.231 | 0.453 | 0.0920 |
| Chr6_0630:19576_G   | G | A | 0.346 | 0/0/6 | 0.000 | 0.000 | 3/3/1 | 0.429 | 0.459 | 3/3/7 | 0.231 | 0.453 | 0.0920 |
| Chr6_0749:34101_C   | C | A | 0.346 | 0/0/6 | 0.000 | 0.000 | 3/3/1 | 0.429 | 0.459 | 3/3/7 | 0.231 | 0.453 | 0.0920 |
| Chr6_1014:830_G     | G | T | 0.346 | 0/0/6 | 0.000 | 0.000 | 3/3/1 | 0.429 | 0.459 | 3/3/7 | 0.231 | 0.453 | 0.0920 |

Table S2 Primer details for additional targeted markers.

| Chr | SNP       | Primer     | sequence (5'-3')         | Tm°C | Ensembl location         |
|-----|-----------|------------|--------------------------|------|--------------------------|
| 1   | 377874_T  | NBAS_fwd   | CTCCCTCAGATCCCCTTTCT     | 59.6 | GL834798:377759-377778   |
|     |           | NBAS_rev   | GAATGCTGCAGAAGATGTGC     | 59.6 | GL834798:377984-378003   |
| 3   | 2253019_T | PAX3.1_fwd | TGCCTGAGAACACGTTTTGAT    | 60.7 | GL849910:2252793-2252813 |
|     |           | PAX3.1_rev | CCAGTGGGATTAGAGCCTTTT    | 59.6 | GL849910:2253165-2253185 |
| 3   | 2290941_C | PAX3.2_fwd | CTGGCATCTGCTCTTTGATCT    | 59.6 | GL849910:2290670-2290690 |
|     |           | PAX3.2_rev | TGGTAAGTCTGGCTCCGAAT     | 59.7 | GL849910:2291024-2291043 |
| 6   | 476140_C  | TLL1.1_fwd | TTCACAACGGACTTGGACAG     | 59.7 | GL864805:475983-476002   |
|     |           | TLL1.1_rev | AGATGTAGACCCAGACATGATACC | 58.4 | GL864805:476196-476219   |
| 6   | 635881_C  | TLL1.2_fwd | AATGGTGGGATGCTGAAAAT     | 59.2 | GL864805:635757-635776   |
|     |           | TLL1.2_rev | GGATAAGAAGATTTGGCTCTGG   | 59.2 | GL864805:635978-635999   |

Table S3 Additional sample details used in targeted genotyping analysis.

| <b>Infection status</b> | <b>Sex</b> | <b>Y.O.B</b> | <b>Age 1<sup>st</sup> infected</b> | <b>Diagnostic criteria</b> |
|-------------------------|------------|--------------|------------------------------------|----------------------------|
| Regressed               | F          | 2006         | 5                                  | Histopathology/cytology    |
| DFTD-infected           | F          | 2006         | 5                                  | Histopathology/cytology    |
| DFTD-infected           | M          | 2005         | 2                                  | Visual inspection          |
| DFTD-infected           | M          | 2006         | 2                                  | Visual inspection          |
| DFTD-infected           | M          | 2003         | 5                                  | Histopathology             |
| DFTD-infected           | F          | 2007         | 2                                  | Visual inspection          |
| DFTD-infected           | M          | 2006         | 3                                  | Cytology                   |
| DFTD-infected           | F          | 2007         | 4                                  | Visual inspection          |
| DFTD-infected           | M          | 2006         | 2                                  | Histopathology             |
| DFTD-infected           | F          | 2006         | 3                                  | Visual inspection          |
| DFTD-infected           | F          | 2006         | 2                                  | Visual inspection          |
| DFTD-infected           | M          | 2006         | 3                                  | Visual inspection          |
| DFTD-infected           | F          | 2008         | 2                                  | Histopathology/cytology    |
| DFTD-infected           | F          | 2006         | 4                                  | Histopathology/cytology    |
